# Supplementary material for: The Indeterminate Domain Protein ROC1 Regulates Chilling Tolerance via Activation of DREB1B/CBF1 in Rice
Source: Int J Mol Sci. 2016 Feb 25;17(3):233. doi: 10.3390/ijms17030233 (PMC4813127; doi:10.3390/ijms17030233)
Supplement: Supplementary file 1 [file ijms-17-00233-s001.pdf]

# Supplementary Materials: The Indeterminate Domain Protein ROC1 Regulates Chilling Tolerance via Activation of *DREB1B/CBF1* in Rice

Mingzhu Dou, Shuai Cheng, Baotian Zhao, Yuanhu Xuan and Minglong Shao

## 1. Ethical Statements

Rice transgenic plants were used in this study. The T-DNA insertion mutant *roc1* (PFG\_3A-09378) was obtained from the SALK rice T-DNA population (<http://signal.salk.edu/cgi-bin/RiceGE/>, Kyung Hee University, Yongin, Korea). The mutant lines were derived from the Japonica rice cultivar “Dongjin”. Transgenic plants, e.g., ROC1 RNAi- and ROC1-Myc- expressing lines, were generated from the Japonica rice cultivar “Nipponbare”.

**Table S1.** Positive interactions from a yeast one-hybrid screen.

| Description                        | Locus No.      | Clone Numbers Identified |
|------------------------------------|----------------|--------------------------|
| ATP binding protein                | LOC_Os09g30200 | 2                        |
| Putative zinc finger protein       | LOC_Os01g54930 | 2                        |
| ZOS9-17 - C2H2 zinc finger protein | LOC_Os09g38340 | 5                        |
| 60S ribosomal protein L29-2        | LOC_Os05g28750 | 2                        |
| 40S ribosomal protein S4           | LOC_Os02g01560 | 1                        |
| Expressed protein                  | LOC_Os08g19050 | 1                        |
| MYB family transcription factor    | LOC_Os02g41510 | 2                        |

**Table S2.** Primer sequences.

| Primers    | Sequences                                 |
|------------|-------------------------------------------|
| ROC1 Myc-F | GATTCATACAAGCTTATGGCGGCCGCTCGTCCGCACCCTTC |
| ROC1 Myc-R | AGATCTGCGGCGGCCATGTTTGCCGGGTCCAGTGAGCCGAC |
| ROC1 Ri-F  | TCTAGAGGCGCGCCATCTCATCATGGGCTCCATG        |
| ROC1 Ri-R  | GGATCCATTTAAATAATTCTGATATGATGAAATG        |
| ROC1 BD-F  | GAATTCATGGCGGCCGCTCGTCCGCACCCTT           |
| ROC1 BD-R  | GTCGACTCAGTTCATGTTTGCCGGGTCCAG            |
| ROC1 GST-F | GAATTCAAGAAGAAGAGGAACCAGCC                |
| ROC1 GST-R | GTCGACGGGCGGCATGCGCGCGTTC                 |
| CBF3 F     | ATGTGCGGGATCAAGCAGGAGATG                  |
| CBF3 R     | CTAGTAGCTCCAGAGTGGGACGTC                  |
| CBF1 F     | GTGAACCAGAGAGAGTCATCCATG                  |
| CBF1 R     | TTAGTAGCTCCAGAGCGGCATGTC                  |
| P1 F       | GGATCCGTCCCTGTTTGATAGCTTG                 |
| P1 R       | CAAGCTATCAAACAGGGACGGATCC                 |
| P2 F       | ACCCTGCAGAAACAGCCCCAAAAC                  |
| P2 R       | GTTTTTGGGGCTGTTTCTGCAGGGT                 |
| mP1 F      | GGATCCGTCTTTTTTTGATAGCTTG                 |
| mP1 R      | CAAGCTATCAAAAAAAGACGGATCC                 |
| P1 ChIP-F  | CTAGATAGAGTTACAGTC                        |
| P1 ChIP-R  | CTTCAAACCAAAATTACC                        |
| P2 ChIP-F  | TACACCTCACCTTACCAC                        |
| P2 ChIP-R  | CAGCTTCACGGCGTTTTTC                       |
| pCBF1 F    | GAATTCACGAGGAAAATATAACTTTGAC              |
| pCBF1 R    | GAGCTCGGATGACTCTCTCTGGTTCACT              |

Table S2. Cont.

| Primers     | Sequences                |
|-------------|--------------------------|
| ROC1 RT-F   | ACCGGGATCAAGAAGCACTACTG  |
| ROC1 RT-R   | GATCAAAGTGAAGAGGCGCCATTG |
| Ubiquitin-F | GCACAAGCACAAGAAGGTGA     |
| Ubiquitin-R | GCCTGCTGGTTGTAGACGTA     |

```

ROC1  1  MAAASSAPFFGLGDTQMPPPNQNTNPFALHHHPNPSAPVAAAAFAPKKRNQPGNPNPDAEVIALSPRTI
ID1   1  MAAAQ-----EPRAKKKRSLPGNPDPEAEVIALSPRAL

ROC1  71  MATNRFVCEVCNKGFORQNLQLHRRGHNLPWKLQKNPKE-----ARRRVYLCPEPSCVHHDESR
ID1  34  VATNRFVCEVCNKGFORQNLQLHRRGHNLPWKLHRAAAVSAVTTAAPAPEKRVYVCPEPTCVHHDPAR

ROC1  132  ALGDLTGIIKKHESRKHGKRWRCERCKRYAVHSDWKAHVKNCGTREYRCDCGILFSRKDSLLTHRAFC
ID1  104  ALGDLTGIIKKHESRKHGKRWRCERCKRYAVHSDWKAHVKNCGTREYRCDCGILFSRKDSLLTHRAFC

ROC1  202  ALAQENARMPPIGAGVYGAGNMTLGLTGMAFPOLPAGFPDQAGCPASAGDVLRIGGGSGASCFDHIM
ID1  174  ALAEPSAR-----LAAANSSSITTTTCNNNIS-----SN--NNNNNN

ROC1  272  ASSSGSSMFRSQSSSSSYLANGAAHHPAQDFGEEDGQSQAGCGSLHGFPAAPFDLLQLPVCHQCSG
ID1  213  SISNSNNLITSSSSPPLFLP---FSTTPAENPNEN-----QLLEFLQHQARHHQLLPQFQPPSS

ROC1  342  NGNLLNLGFSGSGNGGVDQFNGGAGNGGGSIVTSSGLAGNHGGGGGFPSLYNSSEPAGTLPQMSATAI
ID1  273  PPAYFDHLAPGGGGG---VITSSQNDNSSIAGDVMVA-----PGGDSVSFGLTSEGS---VTMHAGDV

ROC1  412  LQRAAQMGATTSSYNAGGAGGASSLLRGASSHGTSVGECPANERSSYNLINGSMASGGGAGFAGSFSG
ID1  332  GRRRLTRDFLGVDHDAG-----EVDETFELDELAD-----ISTTAAACCCNFAAATA

ROC1  482  ASGFGGAVDDGKLSIRDELGVGVVQGISGSAAMGPERHGAAGLHVGSIDPAMN
ID1  381  AC----CATDFTTGSRLGR-----IPP-----VNETWSHNF-

```

**Figure S1.** Sequence alignment of ROC1 and ID1. Identical and similar amino acids are shown in black and gray boxes, respectively. Red horizontal bars under the sequences indicate the ID domain.

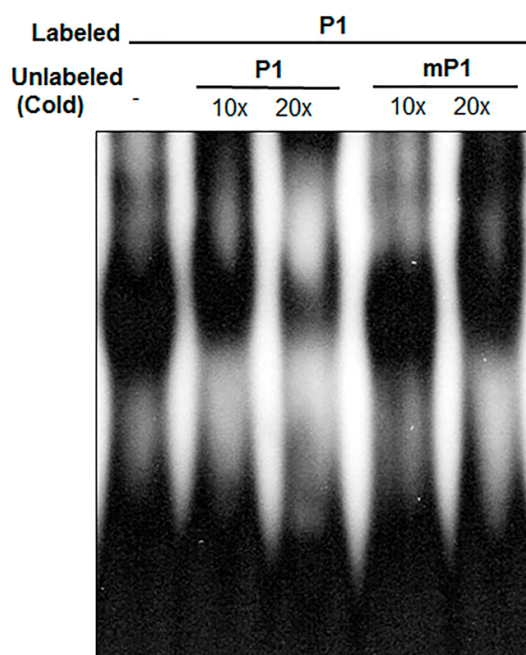

**Figure S2.** Binding specificity of ROC1 to the P1 sequences. A competition assay was performed with an unlabeled probe to P1 (core sequences: CCTGTTT) and its mutation mP1 (core sequences: TTTTTTT). ROC1 bound to the labeled P1 probe was only significantly affected by increasing amounts of unlabeled P1, whereas mP1 slightly interfered with binding.

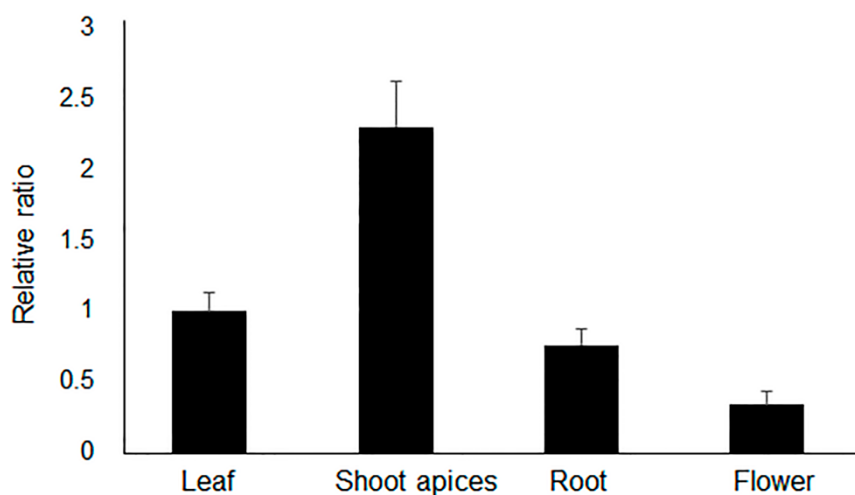

**Figure S3.** Expression patterns of *ROC1*. qRT-PCR was performed on mRNA from the roots and leaves of one-week-old rice plants, shoot apices of three-week-old plants and flowers of three-month-old plants. The mRNA levels were normalized to that of *Ubiquitin* mRNA. Error bars represent the  $\pm$  SE of the means from three replicates.
